# Supplementary material
Source: PubMed Central journal article supplement (PMC2997525)
Supplement: NIHMS254964-supplement-1.pdf [file NIHMS254964-supplement-1.pdf]

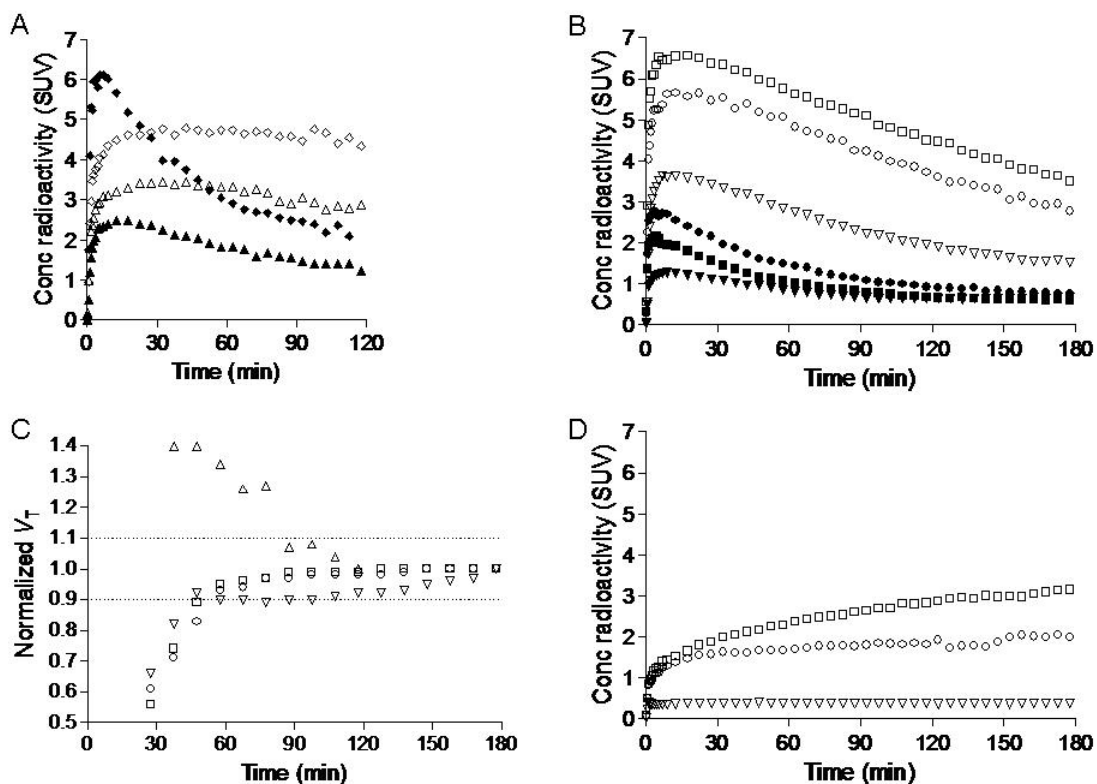

**Supplemental Figure 1.**  $^{11}\text{C}$ -FMePPEP,  $^{18}\text{F}$ -FEPEP,  $^{18}\text{F}$ -FMPEP, or  $^{18}\text{F}$ -FMPEP- $d_2$  in monkey. Time-activity curves were acquired under baseline conditions (open symbol) and 30 min after administration of rimonabant (3 mg/kg, i.v.; closed symbol). (A)  $^{11}\text{C}$ -MePPEP ( $\diamond$ ) is shown as a comparison to  $^{11}\text{C}$ -FMePPEP ( $\Delta$ ), and (B)  $^{18}\text{F}$ -FEPEP ( $\nabla$ ),  $^{18}\text{F}$ -FMPEP ( $\square$ ), and  $^{18}\text{F}$ -FMPEP- $d_2$  ( $\circ$ ) in monkey striatum. (C) Distribution volume ( $V_T$ ) for  $^{11}\text{C}$ -FMePPEP ( $\Delta$ ),  $^{18}\text{F}$ -FEPEP ( $\nabla$ ),  $^{18}\text{F}$ -FMPEP ( $\square$ ), and  $^{18}\text{F}$ -FMPEP- $d_2$  ( $\circ$ ) was calculated using an unconstrained two-tissue compartment model with 0-30 or 0-180 min of data. (D) Radioactivity concentration in monkey bone was greatest in  $^{18}\text{F}$ -FMPEP ( $\square$ ), followed by  $^{18}\text{F}$ -FMPEP- $d_2$  ( $\circ$ ) and  $^{18}\text{F}$ -FEPEP ( $\nabla$ ).

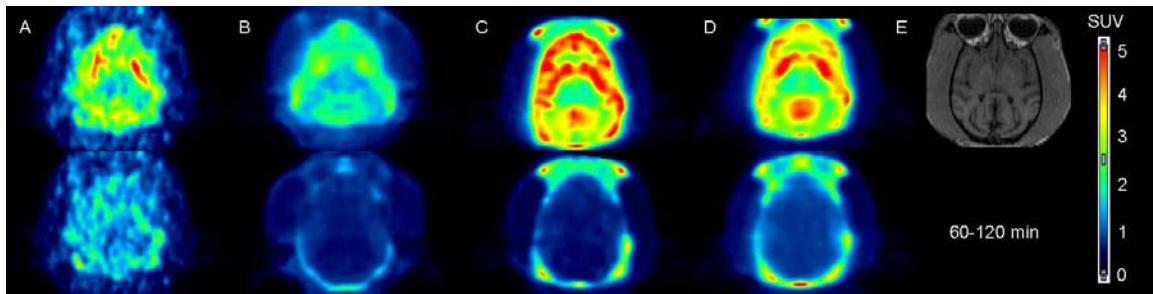

**Supplemental Figure 2.**  $^{11}\text{C}$ -FMePPEP,  $^{18}\text{F}$ -FEPEP,  $^{18}\text{F}$ -FMPEP, or  $^{18}\text{F}$ -FMPEP- $d_2$  in monkey brain. Axial PET images of monkey brain from 60 to 120 minutes after injection of (A)  $^{11}\text{C}$ -FMePPEP and 120 to 180 after injection of (B)  $^{18}\text{F}$ -FEPEP, (C)  $^{18}\text{F}$ -FMPEP, and (D)  $^{18}\text{F}$ -FMPEP- $d_2$  were averaged after baseline conditions (top row) and after pretreatment of rimonabant (3 mg/kg i.v.; bottom row). (E) A representative monkey MRI is provided for reference.

Supplemental Table 1. Distribution volume of several CB<sub>1</sub> selective radioligands in monkey brain

| Radioligand                                  | V <sub>T</sub> striatum |         |          | V <sub>T</sub> pons |         |          |
|----------------------------------------------|-------------------------|---------|----------|---------------------|---------|----------|
|                                              | Baseline                | Blocked | Specific | Baseline            | Blocked | Specific |
| <sup>11</sup> C-MePPEP                       | 24.3                    | 2.9     | 88%      | 8.6                 | 2.6     | 70%      |
| <sup>11</sup> C-FMePPEP                      | 15.9                    | 4.3     | 73%      | 6.5                 | 3.5     | 46%      |
| <sup>18</sup> F-FEPEP                        | 21.6                    | 6.3     | 71%      | 25.0                | 13.2    | 47%      |
| <sup>18</sup> F-FMPEP                        | 63.5                    | 3.8     | 94%      | 37.1                | 8.0     | 78%      |
| <sup>18</sup> F-FMPEP- <i>d</i> <sub>2</sub> | 35.4                    | 5.4     | 85%      | 20.1                | 8.5     | 58%      |

Supplemental Table 2. Kinetic rate constants and distribution volume ( $V_T$ ) in 8 regions of brain from 9 subjects using 120 min of scanning data

| Region            | Rate Constant                                      |                        |                        |                          | $V_T$                    |     | Intersubject Variability |
|-------------------|----------------------------------------------------|------------------------|------------------------|--------------------------|--------------------------|-----|--------------------------|
|                   | $K_1$ (mL $\cdot$ cm $^{-3}$ $\cdot$ min $^{-1}$ ) | $k_2$ (min $^{-1}$ )   | $k_3$ (min $^{-1}$ )   | $k_4$ (min $^{-1}$ )     | (mL $\cdot$ cm $^{-3}$ ) |     |                          |
|                   | SE                                                 | SE                     | SE                     | SE                       | SE                       |     |                          |
| Prefrontal cortex | 0.10 $\pm$ 0.03<br>2%                              | 0.05 $\pm$ 0.02<br>14% | 0.14 $\pm$ 0.03<br>11% | 0.016 $\pm$ 0.004<br>5%  | 22.7 $\pm$ 6.4<br>2%     | 28% |                          |
| Occipital cortex  | 0.11 $\pm$ 0.04<br>1%                              | 0.05 $\pm$ 0.02<br>10% | 0.11 $\pm$ 0.03<br>9%  | 0.020 $\pm$ 0.004<br>4%  | 14.3 $\pm$ 3.4<br>1%     | 24% |                          |
| Hippocampus       | 0.08 $\pm$ 0.02<br>2%                              | 0.06 $\pm$ 0.02<br>13% | 0.12 $\pm$ 0.02<br>10% | 0.010 $\pm$ 0.002<br>6%  | 17.4 $\pm$ 4.1<br>3%     | 24% |                          |
| Putamen           | 0.12 $\pm$ 0.03<br>2%                              | 0.04 $\pm$ 0.02<br>20% | 0.13 $\pm$ 0.03<br>17% | 0.017 $\pm$ 0.004<br>7%  | 24.3 $\pm$ 7.2<br>2%     | 29% |                          |
| Thalamus          | 0.10 $\pm$ 0.03<br>3%                              | 0.06 $\pm$ 0.02<br>16% | 0.11 $\pm$ 0.02<br>15% | 0.022 $\pm$ 0.004<br>6%  | 9.6 $\pm$ 2.5<br>2%      | 26% |                          |
| Cerebellum        | 0.10 $\pm$ 0.03<br>2%                              | 0.06 $\pm$ 0.02<br>10% | 0.09 $\pm$ 0.03<br>9%  | 0.014 $\pm$ 0.002<br>5%  | 14.1 $\pm$ 3.0<br>2%     | 22% |                          |
| Pons              | 0.09 $\pm$ 0.02<br>4%                              | 0.06 $\pm$ 0.02<br>20% | 0.09 $\pm$ 0.03<br>23% | 0.027 $\pm$ 0.005<br>8%  | 6.0 $\pm$ 1.5<br>2%      | 25% |                          |
| White matter      | 0.04 $\pm$ 0.01<br>7%                              | 0.05 $\pm$ 0.01<br>50% | 0.11 $\pm$ 0.03<br>43% | 0.014 $\pm$ 0.004<br>20% | 6.6 $\pm$ 1.9<br>8%      | 29% |                          |

Values of rate constants and  $V_T$  are mean  $\pm$  SD. The identifiability of rate constants and  $V_T$  is inversely related to standard error (SE). The mean SE from 9 subjects is listed below each variable and is expressed as percent of the variable itself. Intersubject variability is the SD divided by the mean, and is expressed as percent.

Supplemental Table 3. Brain uptake and distribution volume ( $V_T$ ) in regions of brain from 8 subjects using 120 min of data

| Region               | Brain Uptake <sub>20-60</sub> |                 |                       |      | $V_T$                            |                                    |                       |      |
|----------------------|-------------------------------|-----------------|-----------------------|------|----------------------------------|------------------------------------|-----------------------|------|
|                      | Test<br>(SUV)                 | Retest<br>(SUV) | Retest<br>Variability | ICC  | Test<br>(mL • cm <sup>-3</sup> ) | Retest<br>(mL • cm <sup>-3</sup> ) | Retest<br>Variability | ICC  |
| Prefrontal<br>cortex | 3.36 ± 0.57                   | 2.92 ± 0.54     | 15%                   | 0.56 | 22.9 ± 6.9<br>2%                 | 21.5 ± 8.3<br>2%                   | 16%                   | 0.91 |
| Occipital<br>cortex  | 3.25 ± 0.55                   | 2.83 ± 0.51     | 15%                   | 0.54 | 14.2 ± 3.7<br>1%                 | 13.4 ± 4.5<br>1%                   | 13%                   | 0.90 |
| Hippocampus          | 2.46 ± 0.32                   | 2.11 ± 0.33     | 16%                   | 0.26 | 17.5 ± 4.4<br>3%                 | 15.6 ± 5.2<br>3%                   | 15%                   | 0.86 |
| Putamen              | 4.00 ± 0.57                   | 3.42 ± 0.55     | 16%                   | 0.37 | 24.3 ± 7.6<br>2%                 | 22.7 ± 8.8<br>3%                   | 17%                   | 0.88 |
| Thalamus             | 2.62 ± 0.39                   | 2.22 ± 0.36     | 17%                   | 0.30 | 9.5 ± 2.7<br>2%                  | 8.7 ± 3.2<br>2%                    | 15%                   | 0.89 |
| Cerebellum           | 2.83 ± 0.42                   | 2.45 ± 0.43     | 15%                   | 0.48 | 14.0 ± 3.2<br>2%                 | 13.1 ± 4.0<br>3%                   | 15%                   | 0.85 |
| Pons                 | 2.10 ± 0.27                   | 1.81 ± 0.25     | 15%                   | 0.24 | 6.0 ± 1.6<br>2%                  | 5.9 ± 1.7<br>7%                    | 9%                    | 0.94 |
| White matter         | 1.20 ± 0.17                   | 1.06 ± 0.15     | 13%                   | 0.51 | 6.5 ± 2.1<br>8%                  | 6.4 ± 2.1<br>12%                   | 11%                   | 0.88 |

Brain uptake is the mean concentration from 20 to 60 min after injection. Values of brain uptake and  $V_T$  are mean ± SD.

The identifiability of  $V_T$  is inversely related to standard error (SE). The mean SE from 8 subjects is listed below its  $V_T$  and is expressed as percent of the variable itself.

Retest variability is the absolute value of the difference between test and retest, divided by their mean, and is expressed as percent.

The intraclass correlation coefficient (ICC) is an analysis of variance comparing the differences within subjects against the differences between subjects. Values approaching 1 suggest that variability is due more to differences between individuals rather than variability of measurements.

Supplemental Table 4. Comparison of  $^{11}\text{C}$ -MePPEP and  $^{18}\text{F}$ -FMPEP- $d_2$

|                                           | $^{11}\text{C}$ -MePPEP | $^{18}\text{F}$ -FMPEP- $d_2$ |
|-------------------------------------------|-------------------------|-------------------------------|
| <u>Affinity*</u>                          |                         |                               |
| $K_i$ (nM)                                | 9.6 ± 0.1               | 9.6 ± 0.1                     |
| <u>Brain uptake</u>                       |                         |                               |
| Peak in putamen (SUV)                     | 3 - 4                   | 3 - 4                         |
| % of peak after 2 hours                   | ~80%                    | ~70%                          |
| Intersubject variability                  | 16%                     | 14%                           |
| Retest variability                        | 8%                      | 16%                           |
| ICC                                       | 0.77                    | 0.39                          |
| <u>Distribution Volume</u>                |                         |                               |
| $V_T$ (mL • cm $^{-3}$ )                  | 12 - 29                 | 13 - 24                       |
| SE (%)                                    | 3 - 7                   | 1 - 3                         |
| <b>Intersubject variability</b>           | <b>&gt; 50%</b>         | <b>26%</b>                    |
| Retest variability                        | 15%                     | 14%                           |
| ICC                                       | 0.87                    | 0.89                          |
| <u>Plasma AUC<math>_{0-\infty}</math></u> |                         |                               |
| <b>Intersubject variability</b>           | <b>&gt; 200%</b>        | <b>13%</b>                    |
| <b>Retest variability</b>                 | <b>58%</b>              | <b>16%</b>                    |
| <b>ICC</b>                                | <b>-0.02</b>            | <b>0.80</b>                   |

The data for  $^{11}\text{C}$ -MePPEP derive from 17 healthy subjects, 8 of whom had retest scans (Terry et al., 2009). The data for  $^{18}\text{F}$ -FMPEP- $d_2$  derive from 9 healthy subjects, 8 of whom had retest scans (current study).

\* Unpublished data; measured in human cerebellum.

Four striking differences are in bold font. The intersubject variability of  $V_T$  and plasma AUC and the retest variability of plasma AUC of  $^{11}\text{C}$ -MePPEP are much higher than those of  $^{18}\text{F}$ -FMPEP- $d_2$ . The ICC of plasma AUC for  $^{11}\text{C}$ -MePPEP is poor.
